# Supplementary material for: Changes in the spike and nucleocapsid protein of porcine epidemic diarrhea virus strain in Vietnam—a molecular potential for the vaccine development?
Source: PeerJ journal article supplement (doi:10.7717/peerj.12329), 2021-10-18
Supplement: Figure_S1.pdf [file Figure_S1.pdf]

|                        |        |     |     |     |     |     |     |             |             |       |      |      |
|------------------------|--------|-----|-----|-----|-----|-----|-----|-------------|-------------|-------|------|------|
|                        | 10     | 20  | 30  | 40  | 50  | 60  | 70  | 80          | 90          | 100   |      |      |
|                        | ← 60 → |     |     |     |     |     |     |             |             |       |      |      |
| SM98/Korea/KJ857455    | M      | R   | S   | L   | T   | F   | P   | L           | L           | P     | L    |      |
| DR13/Korea/JQ023161    | F      | L   | I   |     |     |     |     |             | D           | G     |      |      |
| DR13-V/Korea/DQ462404  | T      | P   | F   | L   | I   |     |     |             | D           | G     |      |      |
| DR13/Korea/DQ862099    | F      | L   | I   |     |     |     |     |             | D           | G     |      |      |
| CV777/CN/KT323979      | T      | P   | F   | L   | I   |     |     |             | D           | G     |      |      |
| AJ1102/CN/JX188454     | K      | T   | F   | S   | SAN |     |     | IGE-NQGVN.T | AGQHP       | H     | RGGH |      |
| France/2014/KR011756   | K      | N   | F   | S   | I   |     |     |             | L           |       | G    |      |
| CV777/Belgium/AF353511 | F      | L   | I   |     |     |     |     |             | L           |       | G    |      |
| Belgium/2015/KR003452  | K      | N   | F   | S   | I   |     |     |             | L           |       | G    |      |
| GER/2014/LM645057      | K      | N   | F   | S   | I   |     |     |             | L           |       | G    |      |
| USA/2013/KF468753      | K      | T   | F   | S   | SAN |     |     | IGE-NQGVN.T | AGQHP       | V     | H    | RGGH |
| USA/2014/KJ399978      | K      | N   | F   | S   | I   |     |     |             | L           |       | G    |      |
| USA/2014/KR265813      | K      | T   | F   | S   | SAN |     |     | IGE-NQGVN.T | AGQHP       | V     | H    | RGGH |
| Mexico/2014/KJ645700   | K      | T   | F   | S   | F   | SAN |     | IGE-NQGVN.T | AGQHP       | V     | H    | RGGH |
| Korea/2002/AF500215    | S      | Y   | SAR |     |     |     |     | GETQGG-APR  | AGRH        | H     | RGGH |      |
| Korea/2008/GU180142    | L      | FV  | Y   | SAN |     |     |     | GETQAG-RP   | AGRHP       | H     | RGGH |      |
| Korea/2008/JN184635    | K      | T   | F   | A   | S   | A   | SAN | H           | TGE-NHGVN.T | AGQHP | H    | RGGH |
| Korea/2009/GU180144    | T      | F   | I   | Y   | SAN |     |     | GETQAG-RP   | AGRHP       | H     | RGGH |      |
| Korea/2010/GU937797    |        |     |     |     |     |     |     |             |             |       |      |      |
| Korea/2011/KC879280    | L      | FV  | H   | SAN |     |     |     | IGE-NQGVN.T | AGQHP       | H     | RGGH |      |
| Korea/2012/KC879281    | L      | FV  | H   | SAN |     |     |     | IGE-NQGVN.T | AGQHP       | H     | RGGH |      |
| Korea/2012/KJ857475    | K      | T   | F   | S   | SAN |     |     | IGE-NQGVN.T | AGQHP       | V     | H    | RGGH |
| Korea/2013/KJ451037    | T      | F   | I   | N   | SAV | Q   |     | GE-KQVDAPR  | AGRVD       | V     | H    | RGGH |
| Korea/2013/KJ451045    | T      | F   | S   | SAN |     |     |     | IGE-NQGVN.T | AGQHP       | V     | H    | RGGH |
| Korea/2014/KJ451047    | T      | F   | S   | SAN |     |     |     | IGE-NQGVN.T | AGQHP       | V     | H    | RGGH |
| Korea/2014/RM403155    | N      | F   | S   | I   |     |     |     |             | L           |       | G    |      |
| Taiwan/2014/KP276250   | K      | T   | F   | S   | SAK |     |     | IGE-NQGVN.T | AGQHP       | V     | H    | RGGH |
| CN/2004/AY653204       | K      | T   | S   | I   |     |     |     |             | L           |       | G    |      |
| CN/2006/DQ985739       | K      | T   | F   | FS  | I   |     |     |             | L           |       | G    |      |
| CN/2010/JX501318       | K      | N   | F   | L   | S   | I   |     |             | L           |       | G    |      |
| CN/2011/JQ638920       | K      | T   | F   | S   | SAN |     |     | IGE-NQGVN.T | AGQHP       | V     | H    | RGGH |
| CN/2011/JN825712       | K      | T   | F   | S   | SAN |     |     | IGE-NQGVN.T | AGQHP       | V     | H    | RGGH |
| CN/2012/KC210145       | K      | T   | F   | S   | SAN |     |     | IGE-NQGVN.T | AGQHP       | V     | H    | RGGH |
| CN/2012/JX112709       | K      | T   | F   | S   | SAN |     |     | IGE-NQGVN.T | AGQHP       | H     | RGGH |      |
| CN/2013/KF761675       | K      | T   | F   | S   | SAN |     |     | IGE-NQGVN.T | AGQHP       | H     | RGGH |      |
| JPN/2013/LC063836      | K      | T   | F   | S   | SAN |     |     | IGE-NQGVN.T | AGQHP       | V     | H    | RGGH |
| JPN/2014/LC063845      | K      | N   | F   | S   | I   |     |     |             | L           |       | G    |      |
| KH/Japan/AB548622      | KF     | F   | S   | SAK | V   |     |     | GEQQNGSAPP  | AGTHTP      | H     | RGGH |      |
| NK/Japan/AB548623      | K      | F   | D   | RAK | L   |     |     | GEQQDGSAPR  | GQH         | H     | RGGH |      |
| Thailand/2008/KC764953 | L      | FV  | SAN |     |     |     |     | IGE-NQGVN.T | AGQHP       | H     | RGGH |      |
| Thailand/2008/KC764952 | L      | FV  | SAN |     |     |     |     | IGE-NQGVN.T | AGQHP       | H     | RGGH |      |
| Thailand/2010/KC764955 | L      | FV  | SAN |     |     |     |     | IGE-NQGVN.T | AGQHP       | H     | RGGH |      |
| Thailand/2011/KC764959 | H      | S   | SAN |     |     |     |     | IGE-NQGVN.T | AGQHP       | H     | RGGH |      |
| Thailand/2012/KC764958 | H      | S   | SAN |     |     |     |     | IGE-NQGVN.T | AGQHP       | H     | RGGH |      |
| Thailand/2013/KF724938 | S      | SAN |     |     |     |     |     | IGE-NQGVN.T | AGQHP       | H     | RGGH |      |
| Thailand/KF724938      | L      | FV  | SAN |     |     |     |     | IGE-NQGVN.T | AGQHP       | H     | RGGH |      |
| HUA PED45/VN/KP455313  | K      | T   | W   | F   | S   | SAN |     | IGE-NQGVN.T | C           | AGQHP | H    | RGGH |
| HUA PED47/VN/KP455314  | K      | T   | W   | F   | S   | SAN |     | IGE-NQGVN.T | AGQHP       | H     | RGGH |      |
| HUA PED67/VN/KP455319  | K      | T   | F   | S   | I   |     |     |             | L           |       | G    |      |
| HUA PED96/VN/KT941120  | KF     | T   | F   | S   | G   | SAK |     | IGE-NYGVN.T | AGQHP       | V     | H    | RGGH |
| JFP/VN/KJ960178        | K      | T   | F   | S   | SAN |     |     | IGE-NQGVN.T | AGQHP       | H     | RGGH |      |
| VAP/VN/KJ960179        | K      | T   | F   | S   | SAN |     |     | IGE-NQGVN.T | AGQHP       | H     | RGGH |      |
| KCHY/VN/KJ960180       | K      | T   | F   | S   | SAN |     |     | IGE-NQGVN.T | AGQHP       | H     | RGGH |      |
| IBT/VN/2018            | K      | T   | F   | S   | SAN |     |     | IGE-NQGVN.T | AGQHP       | H     | RGGH |      |



210      220      230      240      250      260      270      280      290      300

↓

```

SM98/Korea/KJ857455 TRCNRRRSCAMQVVYTPFYMLNVTSAAGEDGIYVEPCTANCTGYAANVFATDSNGHIPECFSEFNNWFLLSNDSTLLHGKVVSNQPLLVNCLLAI PKIYGL
DR13/Korea/JQ023161 . . . . . K . . . . . S . . . . . G . . . . .
DR13-V/Korea/DQ462404 . . . . . K . . . . . S . . . . . G . . . . . W . . . . .
DR13/Korea/DQ862099 . . . . . K . . . . . S . . . . . G . . . . . W . . . . .
CV777/CN/KT323979 . . . . . K . . . . . S . . . . . G . . . . . W . . . . .
AJ1102/CN/JX188454 . . . . . K . . . SGG . . . E . . . S . . . Q . . . I . . . EP . . . G . . . V . . . W . . .
France/2014/KR011756 . . . . . K . . . SGG . . . E . . . S . . . Q . . . I . . . EP . . . G . . . V . . . W . . .
CV777/Belgium/AF353511 . . . . . K . . . SGG . . . E . . . S . . . Q . . . I . . . EP . . . G . . . V . . . W . . .
Belgium/2015/KR003452 . . . . . K . . . SGG . . . E . . . S . . . Q . . . I . . . EP . . . G . . . V . . . W . . .
GER/2014/LM645057 . . . . . K . . . SGG . . . E . . . S . . . Q . . . I . . . EP . . . G . . . V . . . W . . .
USA/2013/KF468753 . . . . . K . . . SGG . . . E . . . S . . . Q . . . I . . . EP . . . G . . . V . . . W . . .
USA/2014/KJ399978 . . . . . K . . . SGG . . . E . . . S . . . Q . . . I . . . EP . . . G . . . V . . . W . . .
USA/2014/KR265813 . . . . . K . . . SGG . . . E . . . S . . . Q . . . I . . . EP . . . G . . . V . . . W . . . S . . .
Mexico/2014/KJ645700 . . . . . K . . . SGG . . . E . . . S . . . Q . . . I . . . EP . . . G . . . V . . . W . . .
Korea/2002/AF500215 . . . . . K . . . SGG . . . E . . . S . . . Q . . . I . . . EP . . . G . . . V . . . W . . .
Korea/2008/GU180142 . . . . . N . . . SGG . . . A . . . E . . . I . . . S . . . Q . . . I . . . EP . . . G . . . V . . . W . . .
Korea/2008/JN184635 . . . . . K . . . SGG . . . E . . . S . . . Q . . . I . . . EP . . . G . . . V . . . W . . .
Korea/2009/GU180144 . . . . . N . . . SGG . . . A . . . E . . . I . . . S . . . Q . . . I . . . EP . . . G . . . V . . . W . . .
Korea/2010/GU937797 . . . . . K . . . SGG . . . E . . . S . . . Q . . . I . . . EP . . . G . . . V . . . W . . .
Korea/2011/KC879280 . . . . . K . . . SGG . . . E . . . S . . . Q . . . I . . . EP . . . G . . . V . . . W . . .
Korea/2012/KC879281 . . . . . K . . . SGG . . . E . . . S . . . Q . . . I . . . EP . . . G . . . V . . . W . . .
Korea/2012/KJ857475 . . . . . K . . . SGG . . . E . . . S . . . Q . . . I . . . EP . . . G . . . V . . . W . . .
Korea/2013/KJ451037 . . . . . SK . . . SGG . . . K . . . I . . . V . . . S . . . QL . . . I . . . EP . . . G . . . V . . . W . . .
Korea/2013/KJ451045 . . . . . K . . . SGG . . . E . . . S . . . Q . . . I . . . EP . . . G . . . V . . . W . . .
Korea/2014/KJ451047 . . . . . K . . . SGG . . . E . . . S . . . Q . . . I . . . EP . . . G . . . V . . . W . . .
Korea/2014/KM403155 . . . . . K . . . SGG . . . E . . . S . . . Q . . . I . . . EP . . . G . . . V . . . W . . .
Taiwan/2014/KP276250 . . . . . K . . . SGG . . . E . . . S . . . Q . . . I . . . EP . . . G . . . V . . . W . . .
CN/2004/AY653204 . . . . . K . . . SGG . . . E . . . S . . . Q . . . I . . . EP . . . G . . . V . . . W . . .
CN/2006/DQ985739 . . . . . K . . . SGG . . . E . . . S . . . Q . . . I . . . EP . . . G . . . V . . . W . . .
CN/2010/JX501318 . . . . . K . . . SGG . . . E . . . S . . . Q . . . I . . . EP . . . G . . . V . . . W . . .
CN/2011/JQ638920 . . . . . K . . . SGG . . . E . . . S . . . Q . . . I . . . EP . . . G . . . V . . . W . . .
CN/2011/JN825712 . . . . . K . . . SGG . . . E . . . S . . . Q . . . I . . . EP . . . G . . . V . . . W . . .
CN/2012/KC210145 . . . . . K . . . SGG . . . E . . . S . . . Q . . . I . . . EP . . . G . . . V . . . W . . .
CN/2012/JX112709 . . . . . K . . . SGG . . . E . . . S . . . Q . . . I . . . EP . . . G . . . V . . . W . . .
CN/2013/KF761675 . . . . . K . . . SGG . . . E . . . S . . . Q . . . I . . . EP . . . G . . . V . . . W . . .
JPN/2013/LC063836 . . . . . K . . . SGG . . . E . . . S . . . Q . . . I . . . EP . . . G . . . V . . . W . . .
JPN/2014/LC063845 . . . . . K . . . SGG . . . E . . . S . . . Q . . . I . . . EP . . . G . . . V . . . W . . .
KH/Japan/AB548622 . . . . . K . . . SGG . . . E . . . S . . . Q . . . I . . . EP . . . G . . . V . . . W . . . I . . .
NK/Japan/AB548623 . . . . . K . . . SGG . . . E . . . S . . . Q . . . I . . . EP . . . G . . . V . . . W . . .
Thailand/2008/KC764953 . . . . . K . . . SGG . . . E . . . S . . . Q . . . I . . . EP . . . G . . . V . . . W . . .
Thailand/2008/KC764952 . . . . . K . . . SGG . . . E . . . S . . . Q . . . I . . . EP . . . G . . . V . . . W . . .
Thailand/2010/KC764955 . . . . . K . . . SGG . . . G . . . S . . . QH . . . I . . . EP . . . G . . . V . . . W . . . H . . .
Thailand/2011/KC764955 . . . . . K . . . SGG . . . E . . . S . . . Q . . . SD . . . S . . . DG . . . G . . . V . . . W . . .
Thailand/2012/KC764958 . . . . . K . . . SGG . . . E . . . S . . . Q . . . SD . . . S . . . DG . . . G . . . V . . . W . . .
Thailand/2013/KF724938 . . . . . K . . . SGG . . . E . . . S . . . Q . . . I . . . EP . . . G . . . V . . . W . . .
Thailand/KF724938 . . . . . K . . . SGG . . . E . . . S . . . Q . . . I . . . EP . . . G . . . V . . . W . . .
HUA PED45/VN/KP455313 . . . . . K . . . SGG . . . E . . . S . . . Q . . . I . . . EP . . . G . . . V . . . W . . . T . . .
HUA PED47/VN/KP455314 . . . . . K . . . SGG . . . E . . . S . . . Q . . . I . . . EP . . . G . . . V . . . W . . . M . . . T . . .
HUA PED67/VN/KP455319 . . . . . K . . . SGG . . . E . . . S . . . Q . . . I . . . EP . . . G . . . V . . . W . . . M . . .
HUA PED96/VN/KT941120 . . . . . K . . . SGG . . . E . . . S . . . G . . . S . . . QL . . . I . . . S . . . QP . . . G . . . V . . . W . . . M . . .
JFP/VN/KJ960178 . . . . . K . . . SGG . . . E . . . S . . . Q . . . I . . . EP . . . G . . . V . . . W . . . M . . .
VAP/VN/KJ960179 . . . . . K . . . SGG . . . E . . . S . . . Q . . . I . . . EP . . . G . . . V . . . W . . . M . . .
KCHY/VN/KJ960180 . . . . . K . . . SGG . . . E . . . S . . . Q . . . I . . . EP . . . G . . . V . . . W . . . M . . .
IBT/VN/2018 . . . . . K . . . SGG . . . E . . . S . . . Q . . . I . . . EP . . . G . . . V . . . W . . . M . . .

```






510
520
530
540
550
560
570
580
590
600

SM98/Korea/KJ857455 SHEQPISEFVTLPLFNDHSFVNITVSAAFGGLSSANLVASDITTINGPSSFCVDTRQPTITLTFYVNVNSYGVVSKSQDSNCPFTLQSLVNDYLSFSKFCVSTS  
 DR13/Korea/JQ023161 .....S.....H.G...I.....  
 DR13-V/Korea/DQ462404 .....S.....H.G...I.....  
 DR13/Korea/DQ862099 .....S.....H.G...I.....  
 CV777/CN/KT323979 .....S.....H.G...I.....  
 AJ1102/CN/JX188454 .....T.....S.....H.G...I.....S.....  
 France/2014/KR011756 .....S.....S.....H.G...I.....S.....  
 CV777/Belgium/AF353511 .....S.....S.....H.G...I.....S.....  
 Belgium/2015/KR003452 .....S.....S.....H.G...I.....S.....N.....  
 GER/2014/LM645057 .....S.....S.....H.G...I.....S.....  
 USA/2013/KF468753 .....S.....S.....H.G...I.....S.....  
 USA/2014/KJ399978 .....S.....S.....H.G...I.....S.....  
 USA/2014/KR265813 .....S.....S.....H.G...I.....S.....  
 Mexico/2014/KJ645700 .....S.....S.....H.G...I.....S.....  
 Korea/2002/AF500215 .....S.....DSGG.....R.....S.....  
 Korea/2008/GU180142 .....S.....DSGG.....R.....  
 Korea/2008/JN184635 .....S.....S.....H.G...I.....VS.....  
 Korea/2009/GU180144 .....S.....DSGG.....R.....  
 Korea/2010/GU937797 .....S.....S.....H.G...I.....R.....  
 Korea/2011/KC879280 .....T.....S.....S.....DH.G...I.....R.....  
 Korea/2012/KC879281 .....T.....S.....S.....DH.G...P.....R.....  
 Korea/2012/KJ857475 .....S.....S.....S.....H.G...I.....S.....  
 Korea/2013/KJ451037 .....S.....S.....DH.G...I.....G.....S.....I.....N.....  
 Korea/2013/KJ451045 .....S.....S.....H.G...I.....S.....  
 Korea/2014/KJ451047 .....S.....S.....H.G...I.....S.....  
 Korea/2014/KM403155 .....S.....S.....H.G...I.....S.....  
 Taiwan/2014/KP276250 .....S.....S.....H.G...I.....S.....  
 CN/2004/AY653204 .....S.....S.....H.G...I.....S.....  
 CN/2006/DQ985739 .....S.....S.....H.G...I.....S.....  
 CN/2010/JX501318 .....S.....S.....H.G...I.....S.....  
 CN/2011/JQ638920 .....T.....S.....S.....H.G...I.....S.....N.....  
 CN/2011/JN825712 .....S.....S.....S.....G...I.....S.....  
 CN/2012/KC210145 .....S.....S.....S.....H.G...I.....S.....N.....  
 CN/2012/JX112709 .....T.....S.....S.....H.G...I.....S.....  
 CN/2013/KF761675 .....Y.....T.....S.....S.....H.G...I.....S.....  
 JPN/2013/LC063836 .....S.....S.....S.....H.G...I.....S.....  
 JPN/2014/LC063845 .....S.....S.....S.....H.G...I.....S.....  
 KH/Japan/AB548622 .....S.....S.....H.GG...I.....R.....I.....N.....S.....  
 NK/Japan/AB548623 .....S.....S.....DSGG.....H.....  
 Thailand/2008/KC764953 .....S.....S.....S.....H.G...I.....S.....  
 Thailand/2008/KC764952 .....S.....S.....S.....H.G...I.....S.....C.....  
 Thailand/2010/KC764955 .....S.....S.....S.....H.G...I.....S.....G.....  
 Thailand/2011/KC764959 .....S.....S.....S.....H.G...I.....S.....  
 Thailand/2012/KC764958 .....S.....S.....S.....H.G...I.....S.....  
 Thailand/2013/KF724938 .....S.....S.....Y.G...I.....S.....  
 Thailand/KF724938 .....S.....S.....S.....H.G...I.....S.....  
 HUA PED45/VN/KP455313 .....T.....S.....S.....DH.G...I.....S.....  
 HUA PED47/VN/KP455314 .....T.....S.....S.....DH.G...I.....S.....  
 HUA PED67/VN/KP455319 .....S.....S.....S.....H.G...I.....S.....  
 HUA PED96/VN/KT941120 .....T.....S.....S.....P.G...I.....S.....A.....  
 JFP/VN/KJ960178 .....T.....S.....K.....HRG...I.....R.....SR.....PT.....G.....G.....  
 VAP/VN/KJ960179 .....T.....S.....S.....H.G...I.....W.....S.....S.....PT.....  
 KCHY/VN/KJ960180 .....T.....S.....S.....H.G...I.....W.....S.....S.....PT.....  
 IBT/VN/2018 .....IY.....T.....S.....S.....H.G...I.....S.....

|                        |                       |             |                 |                |           |          |              |         |        |        |
|------------------------|-----------------------|-------------|-----------------|----------------|-----------|----------|--------------|---------|--------|--------|
|                        | 610                   | 620         | 630             | 640            | 650       | 660      | 670          | 680     | 690    | 700    |
|                        | .....                 | .....       | .....           | .....          | .....     | .....    | .....        | .....   | .....  | .....  |
| SM98/Korea/KJ857455    | LLAGACTIDLFGYPAFGS--- | GVKLTSLYFQF | KGBELTCTGPKPLEG | ITDVSFMTLDVCTK | YTYGFKGEG | ITTLTNS  | SLAGVYVYTSNS | GGQLLAF | KNV    |        |
| DR13/Korea/JQ023161    | .....                 | E.....      | F.....          | .....          | V.....    | .....    | F.....       | D.....  |        |        |
| DR13-V/Korea/DQ462404  | .....                 | E.....      | F.....          | S.....         | Q.V.....  | .....    | F.....       | D.....  |        |        |
| DR13/Korea/DQ862099    | .....                 | .....       | .....           | .....          | .....     | .....    | .....        | D.....  |        |        |
| CV777/CN/KT323979      | .....                 | E.....      | F.....          | .....          | Q.V.....  | .....    | F.....       | D.....  |        |        |
| AJ1102/CN/JX188454     | .....                 | S.....      | E.....          | F.....         | .....     | V.....   | F.....       | F.....  | D..... |        |
| France/2014/KR011756   | .....                 | S.....      | E.....          | F.....         | .....     | V.....   | F.....       | D.....  |        |        |
| CV777/Belgium/AF353511 | .....                 | .....       | .....           | .....          | .....     | .....    | .....        | D.....  |        |        |
| Belgium/2015/KR003452  | .....                 | SG.....     | E.....          | F.....         | .....     | V.....   | F.....       | D.....  |        |        |
| GER/2014/LM645057      | .....                 | S.....      | E.....          | F.....         | .....     | V.....   | F.....       | D.....  |        |        |
| USA/2013/KF468753      | .....                 | S.....      | E.....          | F.....         | .....     | V.....   | F.....       | D.....  |        |        |
| USA/2014/KJ399978      | .....                 | S.....      | E.....          | F.....         | .....     | V.....   | F.....       | D.....  |        |        |
| USA/2014/KR265813      | .....                 | S.....      | E.....          | F.....         | .....     | V.....   | F.....       | D.....  |        |        |
| Mexico/2014/KJ645700   | .....                 | S.....      | E.....          | F.....         | .....     | V.....   | F.....       | D.....  |        |        |
| Korea/2002/AF500215    | .....                 | .....       | .....           | .....          | .....     | V.....   | F.....       | D.....  |        |        |
| Korea/2008/GU180142    | .....                 | .....       | .....           | .....          | .....     | Q.V..... | F.....       | D.....  |        |        |
| Korea/2008/JN184635    | .....                 | S.....      | H.D.....        | D.....         | F.....    | .....    | F.....       | D.....  |        |        |
| Korea/2009/GU180144    | .....                 | .....       | .....           | .....          | .....     | Q.V..... | F.....       | D.....  |        |        |
| Korea/2010/GU937797    | .....                 | .....       | .....           | .....          | .....     | .....    | .....        | D.....  |        |        |
| Korea/2011/KC879280    | .....                 | SS.....     | D.....          | F.....         | E.....    | .....    | V.....       | F.....  | D..... |        |
| Korea/2012/KC879281    | .....                 | SS.....     | D.....          | F.....         | E.....    | .....    | V.....       | F.....  | D..... |        |
| Korea/2012/KJ857475    | .....                 | S.....      | E.....          | F.....         | E.....    | .....    | V.....       | F.....  | I..... | D..... |
| Korea/2013/KJ451037    | .....                 | S.....      | .....           | .....          | .....     | V.....   | F.....       | F.....  | D..... |        |
| Korea/2013/KJ451045    | .....                 | S.....      | E.....          | F.....         | .....     | V.....   | F.....       | D.....  |        |        |
| Korea/2014/KJ451047    | .....                 | S.....      | E.....          | F.....         | .....     | V.....   | F.....       | D.....  |        |        |
| Korea/2014/KM403155    | .....                 | S.....      | E.....          | F.....         | .....     | V.....   | F.....       | D.....  |        |        |
| Taiwan/2014/KP276250   | .....                 | S.....      | E.....          | F.....         | .....     | V.....   | F.....       | D.....  | P..... |        |
| CN/2004/AY653204       | .....                 | S.....      | E.....          | F.....         | E.....    | .....    | V.....       | F.....  | D..... | L..... |
| CN/2006/DQ985739       | .....                 | S.....      | E.....          | F.....         | .....     | V.....   | F.....       | D.....  |        |        |
| CN/2010/JX501318       | .....                 | S.....      | E.....          | F.....         | .....     | V.....   | S.....       | F.....  | H..... | D..... |
| CN/2011/JQ638920       | .....                 | S.....      | E.....          | F.....         | .....     | V.....   | .....        | F.....  | H..... | D..... |
| CN/2011/JN825712       | .....                 | S.....      | E.....          | F.....         | .....     | V.....   | .....        | F.....  | F..... | D..... |
| CN/2012/KC210145       | .....                 | S.....      | D.....          | F.....         | .....     | V.....   | .....        | F.....  | D..... |        |
| CN/2012/JX112709       | .....                 | S.....      | E.....          | F.....         | .....     | V.....   | .....        | F.....  | D..... |        |
| CN/2013/KF761675       | .....                 | S.....      | E.....          | F.....         | .....     | V.....   | .....        | F.....  | F..... | D..... |
| JPN/2013/LC063836      | .....                 | S.....      | E.....          | F.....         | .....     | V.....   | T.....       | F.....  | D..... |        |
| JPN/2014/LC063845      | .....                 | S.....      | E.....          | F.....         | .....     | V.....   | .....        | F.....  | D..... |        |
| KH/Japan/AB548622      | I.....                | E.....      | .....           | V.....         | F.....    | .....    | V.....       | L.....  | F..... | D..... |
| NK/Japan/AB548623      | .....                 | .....       | SSGG.....       | F.....         | .....     | V.....   | .....        | L.....  | F..... | F..... |
| Thailand/2008/KC764953 | .....                 | S.....      | E.....          | F.....         | .....     | V.....   | .....        | F.....  | D..... |        |
| Thailand/2008/KC764952 | .....                 | S.....      | E.....          | F.....         | .....     | V.....   | .....        | F.....  | D..... |        |
| Thailand/2010/KC764955 | .....                 | .....       | D.....          | F.....         | .....     | V.....   | I.....       | F.....  | D..... |        |
| Thailand/2011/KC764959 | .....                 | S.....      | D.....          | F.....         | .....     | V.....   | .....        | F.....  | D..... |        |
| Thailand/2012/KC764958 | .....                 | S.....      | D.....          | F.....         | .....     | V.....   | .....        | F.....  | D..... |        |
| Thailand/2013/KF724938 | .....                 | S.....      | E.....          | F.....         | .....     | V.....   | A.....       | F.....  | D..... |        |
| Thailand/KF724938      | .....                 | S.....      | E.....          | F.....         | .....     | V.....   | .....        | F.....  | D..... |        |
| HUA PED45/VN/KP455313  | .....                 | S.....      | E.....          | F.....         | .....     | V.....   | S.....       | G.....  | Y..... | F..... |
| HUA PED47/VN/KP455314  | .....                 | S.....      | E.....          | F.....         | .....     | V.....   | G.....       | F.....  | D..... |        |
| HUA PED67/VN/KP455319  | .....                 | S.....      | E.....          | F.....         | .....     | V.....   | .....        | F.....  | D..... |        |
| HUA PED96/VN/KT941120  | .....                 | S.....      | D.....          | VA.....        | .....     | V.....   | .....        | F.....  | D..... |        |
| JFP/VN/KJ960178        | .....                 | S.....      | E.....          | F.....         | .....     | V.....   | .....        | F.....  | D..... |        |
| VAP/VN/KJ960179        | .....                 | S.....      | E.....          | F.....         | .....     | V.....   | .....        | F.....  | D..... |        |
| KCHY/VN/KJ960180       | .....                 | S.....      | E.....          | F.....         | .....     | V.....   | .....        | F.....  | D..... |        |
| IBT/VN/2018            | .....                 | S.....      | E.....          | F.....         | .....     | V.....   | .....        | FF..... | D..... |        |

|                        |                                                                                                      |     |     |     |     |     |     |     |     |     |
|------------------------|------------------------------------------------------------------------------------------------------|-----|-----|-----|-----|-----|-----|-----|-----|-----|
|                        | 710                                                                                                  | 720 | 730 | 740 | 750 | 760 | 770 | 780 | 790 | 800 |
|                        | <p style="text-align: center;">↓</p>                                                                 |     |     |     |     |     |     |     |     |     |
| SM98/Korea/KJ857455    | TSGAVYSVTPCSPSEQAAYVNDIIVGVISLNSNFTNNRLEPQFFYHSNDGSCNTEPVLVYSNIGVCKSGSIGYVPPQYCGQVKIAPVTVTGNISIPTNFS |     |     |     |     |     |     |     |     |     |
| DR13/Korea/JQ023161    | .....D.....S.....                                                                                    |     |     |     |     |     |     |     |     |     |
| DR13-V/Korea/DQ462404  | .....D.....K.....L.D.....M.....                                                                      |     |     |     |     |     |     |     |     |     |
| DR13/Korea/DQ862099    | .....D.....S.....S.....L.D.....M.....                                                                |     |     |     |     |     |     |     |     |     |
| CV777/CN/KT323979      | .....D.....S.....S.....L.D.....M.....                                                                |     |     |     |     |     |     |     |     |     |
| AJ1102/CN/JX188454     | .....D.....S.....S.....S.....S.....                                                                  |     |     |     |     |     |     |     |     |     |
| France/2014/KR011756   | .....D.....S.....S.....S.....S.....                                                                  |     |     |     |     |     |     |     |     |     |
| CV777/Belgium/AF353511 | .....D.....S.....S.....S.....S.....                                                                  |     |     |     |     |     |     |     |     |     |
| Belgium/2015/KR003452  | .....D.....S.....S.....S.....S.....                                                                  |     |     |     |     |     |     |     |     |     |
| GER/2014/LM645057      | .....D.....S.....S.....S.....S.....                                                                  |     |     |     |     |     |     |     |     |     |
| USA/2013/KF468753      | .....D.....S.....S.....S.....S.....                                                                  |     |     |     |     |     |     |     |     |     |
| USA/2014/KJ399978      | .....D.....S.....S.....S.....S.....                                                                  |     |     |     |     |     |     |     |     |     |
| USA/2014/KR265813      | .....D.....S.....S.....S.....S.....                                                                  |     |     |     |     |     |     |     |     |     |
| Mexico/2014/KJ645700   | .....D.....S.....S.....S.....S.....                                                                  |     |     |     |     |     |     |     |     |     |
| Korea/2002/AF500215    | .....D.....G.....X.DF.....L.D.....I.....                                                             |     |     |     |     |     |     |     |     |     |
| Korea/2008/GU180142    | .....D.....L.D.....L.D.....                                                                          |     |     |     |     |     |     |     |     |     |
| Korea/2008/JN184635    | .....V.D.....A.....S.....S.....S.....                                                                |     |     |     |     |     |     |     |     |     |
| Korea/2009/GU180144    | .....D.....L.....L.....                                                                              |     |     |     |     |     |     |     |     |     |
| Korea/2010/GU937797    | .....D.....S.....S.....S.....S.....                                                                  |     |     |     |     |     |     |     |     |     |
| Korea/2011/KC879280    | .....D.....S.....S.....S.....S.....                                                                  |     |     |     |     |     |     |     |     |     |
| Korea/2012/KC879281    | .....D.....C.....S.....S.....                                                                        |     |     |     |     |     |     |     |     |     |
| Korea/2012/KJ857475    | .....D.....S.....S.....S.....R.....                                                                  |     |     |     |     |     |     |     |     |     |
| Korea/2013/KJ451037    | .....D.....S.....M.....S.....S.....                                                                  |     |     |     |     |     |     |     |     |     |
| Korea/2013/KJ451045    | .....D.....S.....S.....S.....S.....                                                                  |     |     |     |     |     |     |     |     |     |
| Korea/2014/KJ451047    | .....D.....S.....S.....S.....S.....                                                                  |     |     |     |     |     |     |     |     |     |
| Korea/2014/KM403155    | .....D.....S.....S.....S.....S.....E.....                                                            |     |     |     |     |     |     |     |     |     |
| Taiwan/2014/KP276250   | .....D.....S.....S.....S.....S.....                                                                  |     |     |     |     |     |     |     |     |     |
| CN/2004/AY653204       | .....D.....S.....S.....S.....S.....                                                                  |     |     |     |     |     |     |     |     |     |
| CN/2006/DQ985739       | .....D.....S.....S.....S.....S.....                                                                  |     |     |     |     |     |     |     |     |     |
| CN/2010/JX501318       | .....D.V.....S.....S.....S.....S.....                                                                |     |     |     |     |     |     |     |     |     |
| CN/2011/JQ638920       | .....D.....S.....S.....S.....S.....V.....                                                            |     |     |     |     |     |     |     |     |     |
| CN/2011/JN825712       | .....D.....S.....S.....S.....S.....                                                                  |     |     |     |     |     |     |     |     |     |
| CN/2012/KC210145       | .....D.....S.....S.....S.....S.....                                                                  |     |     |     |     |     |     |     |     |     |
| CN/2012/JX112709       | .....D.....S.....S.....S.....RS.....                                                                 |     |     |     |     |     |     |     |     |     |
| CN/2013/KF761675       | .....D.....S.....S.....S.....S.....                                                                  |     |     |     |     |     |     |     |     |     |
| JPN/2013/LC063836      | .....D.....S.....S.....S.....S.....                                                                  |     |     |     |     |     |     |     |     |     |
| JPN/2014/LC063845      | .....D.....S.....S.....G.....S.....S.....                                                            |     |     |     |     |     |     |     |     |     |
| KH/Japan/AB548622      | .....D.....L.D.....M.....                                                                            |     |     |     |     |     |     |     |     |     |
| NK/Japan/AB548623      | .....D.....S.....S.....S.....S.....                                                                  |     |     |     |     |     |     |     |     |     |
| Thailand/2008/KC764953 | .....D.....I.....S.....S.....S.....S.....                                                            |     |     |     |     |     |     |     |     |     |
| Thailand/2008/KC764952 | .....D.....S.....S.....S.....S.....                                                                  |     |     |     |     |     |     |     |     |     |
| Thailand/2010/KC764955 | .....D.....L.G.....T.....A.....                                                                      |     |     |     |     |     |     |     |     |     |
| Thailand/2011/KC764959 | .....D.....L.G.....L.G.....A.....                                                                    |     |     |     |     |     |     |     |     |     |
| Thailand/2012/KC764958 | .....H.....I.....FC.....S.....L.G.....A.....                                                         |     |     |     |     |     |     |     |     |     |
| Thailand/2013/KF724938 | .....D.....S.....S.....S.....S.....A.....                                                            |     |     |     |     |     |     |     |     |     |
| Thailand/KF724938      | .....D.....S.....S.....L.G.....T.....A.....                                                          |     |     |     |     |     |     |     |     |     |
| HUA PED45/VN/KP455313  | .....D.....S.....S.....LS.....S.....                                                                 |     |     |     |     |     |     |     |     |     |
| HUA PED47/VN/KP455314  | .....D.....S.....S.....LS.....S.....                                                                 |     |     |     |     |     |     |     |     |     |
| HUA PED67/VN/KP455319  | .....D.....S.....S.....S.....S.....                                                                  |     |     |     |     |     |     |     |     |     |
| HUA PED96/VN/KT941120  | .....D.....S.....K.....S.....S.....                                                                  |     |     |     |     |     |     |     |     |     |
| JFP/VN/KJ960178        | .....D.....S.....S.....S.....S.....                                                                  |     |     |     |     |     |     |     |     |     |
| VAP/VN/KJ960179        | .....D.....S.....S.....S.....S.....                                                                  |     |     |     |     |     |     |     |     |     |
| KCHY/VN/KJ960180       | .....D.....S.....S.....S.....S.....                                                                  |     |     |     |     |     |     |     |     |     |
| IBT/VN/2018            | .....D.....S.....LS.....S.....                                                                       |     |     |     |     |     |     |     |     |     |





```

          910       920       930       940       950       960       970       980       990      1000
SM98/Korea/KJ857455 VVQKRSVIEDLLFNKVVVINGLGTVDDEDYKRCNCNRSVADLVCAQYYSGVMLPGVVDAAEKRLHMYASLIGGMALGGITAAALPFSYAVQARLNVYLAQLT
DR13/Korea/JQ023161 .....F.....
DR13-V/Korea/DQ462404 .....G.F.....L.S...S.H...
DR13/Korea/DQ862099 .....F.....
CV777/CN/KT323979 .....G.F.....L.T...H...
AJ1102/CN/JX188454 .....F.....V.F.....
France/2014/KR011756 .....F.....V.F.S...
CV777/Belgium/AF353511 .....F.....V.F.S...
Belgium/2015/KR003452 .....F.....V.F.S...
GER/2014/LM645057 .....F.....V.F.S...
USA/2013/KF468753 .....F.....V.F.S...
USA/2014/KJ399978 .....F.....V.F.S...
USA/2014/KR265813 .....F.....V.F.S...
Mexico/2014/KJ645700 .....F.....V.F.S...
Korea/2002/AF500215 ..HE.F.....X.....I.....F..V...
Korea/2008/GU180142 ..IH.E.F.....I.....F..V...
Korea/2008/JN184635 .....H.F.....F.....
Korea/2009/GU180144 .....I.....V..V..F.....
Korea/2010/GU937797 .....F.....V.F.S...T...
Korea/2011/KC879280 .....H..F..G.....L.....P.....V..F.....
Korea/2012/KC879281 .....H..F.....L.....V..F.....
Korea/2012/KJ857475 .....F.....V..F.S...I...
Korea/2013/KJ451037 .....F.....V..F.S...
Korea/2013/KJ451045 .....H..F.....F.S...
Korea/2014/KJ451047 .....F.....V..F.S...
Korea/2014/KM403155 .....F.....V..F.S...
Taiwan/2014/KP276250 .....F.....V..F.S...
CN/2004/AY653204 .....H..F.....F.V...
CN/2006/DQ985739 .....F.....P.....V..F.....E.L...
CN/2010/JX501318 .....F.....V..F.S...
CN/2011/JQ638920 .....F..E.....V..F.S...
CN/2011/JN825712 .....F.....V..F.S...
CN/2012/KC210145 .....F.....V..F.S...
CN/2012/JX112709 .....F.....V..F.....
CN/2013/KF761675 .....F.....V..F.S...
JPN/2013/LC063836 .....F.....V..F.S...
JPN/2014/LC063845 .....F.....V..F.S...
KH/Japan/AB548622 .....H..F.....F.....
NK/Japan/AB548623 ..IH..F.....I.....F..V...
Thailand/2008/KC764953 .....H..F.....F.....V...
Thailand/2008/KC764952 .....H..F.....F.....
Thailand/2010/KC764955 .....F.....A.....VF..F.....
Thailand/2011/KC764959 .....F.....A.....VF..F.....
Thailand/2012/KC764958 .....F.....A.....VF..F.....
Thailand/2013/KF724938 .....K.F.....I.....A.....VF..F.....
Thailand/KF724938 .....F.....A.....VF..F.....
HUA PED45/VN/KP455313 .....F.....V..F.....
HUA PED47/VN/KP455314 .....F.....V..F.....
HUA PED67/VN/KP455319 .....F.....V..F.....
HUA PED96/VN/KT941120 .....F.....V..F.S...
JFP/VN/KJ960178 .....F.....V..F.....
VAP/VN/KJ960179 .....F.....V..F.....
KCHY/VN/KJ960180 .....F.....V..F.....
IBT/VN/2018 .....F.....V..F.S...

```

▼ 1010      1020      1030      1040      1050      1060      1070      1080      ▼ 1090      1100

```

SM98/Korea/KJ857455  DVILQRNQQLLAESFN...  T
DR13/Korea/JQ023161  .....  T..I
DR13-V/Korea/DQ462404 .....  N.....T..I
DR13/Korea/DQ862099 .....  N.....T..I
CV777/CN/KT323979 .....  N.....T..I
AJ1102/CN/JX188454 .....  A..T
France/2014/KR011756 .....  A..T
CV777/Belgium/AF353511 .....  A..T
Belgium/2015/KR003452 .....  A..T
GER/2014/LM645057 .....  A..T
USA/2013/KF468753 .....  A..T
USA/2014/KJ399978 .....  A..T
USA/2014/KR265813 .....  A..T
Mexico/2014/KJ645700 .....  A..T
Korea/2002/AF500215 .....  S..N.....T..I
Korea/2008/GU180142 .....  A..Q.....T..I
Korea/2008/JN184635 .....  H.....Q.....A..S..I
Korea/2009/GU180144 .....  Q.....A..S..I
Korea/2010/GU937797 .....  Q.....N
Korea/2011/KC879280 .....  Q.....A..T
Korea/2012/KC879281 .....  Q.....A..T
Korea/2012/KJ857475 .....  A..T
Korea/2013/KJ451037 .....  A..T
Korea/2013/KJ451045 .....  T.....A..S..I
Korea/2014/KJ451047 .....  A..T
Korea/2014/KM403155 .....  A..T
Taiwan/2014/KP276250 .....  A..T
CN/2004/AY653204 .....  A..T
CN/2006/DQ985739 .....  H.....A..T.....S..G
CN/2010/JX501318 .....  A..T
CN/2011/JQ638920 .....  Y.....A..T
CN/2011/JN825712 .....  A..T
CN/2012/KC210145 .....  A..T.....T
CN/2012/JX112709 .....  P.....A..T
CN/2013/KF761675 .....  H..A..T
JPN/2013/LC063836 .....  A..T
JPN/2014/LC063845 .....  A..T
KH/Japan/AB548622 .....  H.....T.....V..A
NK/Japan/AB548623 .....  T..I
Thailand/2008/KC764953 .....  P.....A.....S..Q.....E..S..W..E..S..I.....T.....IN...V
Thailand/2008/KC764952 .....  Q.....A..S..I.....T.....T.....IN...V
Thailand/2010/KC764955 .....  A..T.....P
Thailand/2011/KC764959 .....  L..VA..T..A
Thailand/2012/KC764958 .....  L.....A..T
Thailand/2013/KF724938 .....  A..T
Thailand/KF724938 .....  F.....A..T..P
HUA PED45/VN/KP455313 .....  A..T.....V
HUA PED47/VN/KP455314 .....  A..T
HUA PED67/VN/KP455319 .....  A..T
HUA PED96/VN/KT941120 .....  A..T
JFP/VN/KJ960178 .....  A..T
VAP/VN/KJ960179 .....  A..T
KCHY/VN/KJ960180 .....  A.....A.....A..T
IBT/VN/2018 .....  M.....A..T.....L
  
```





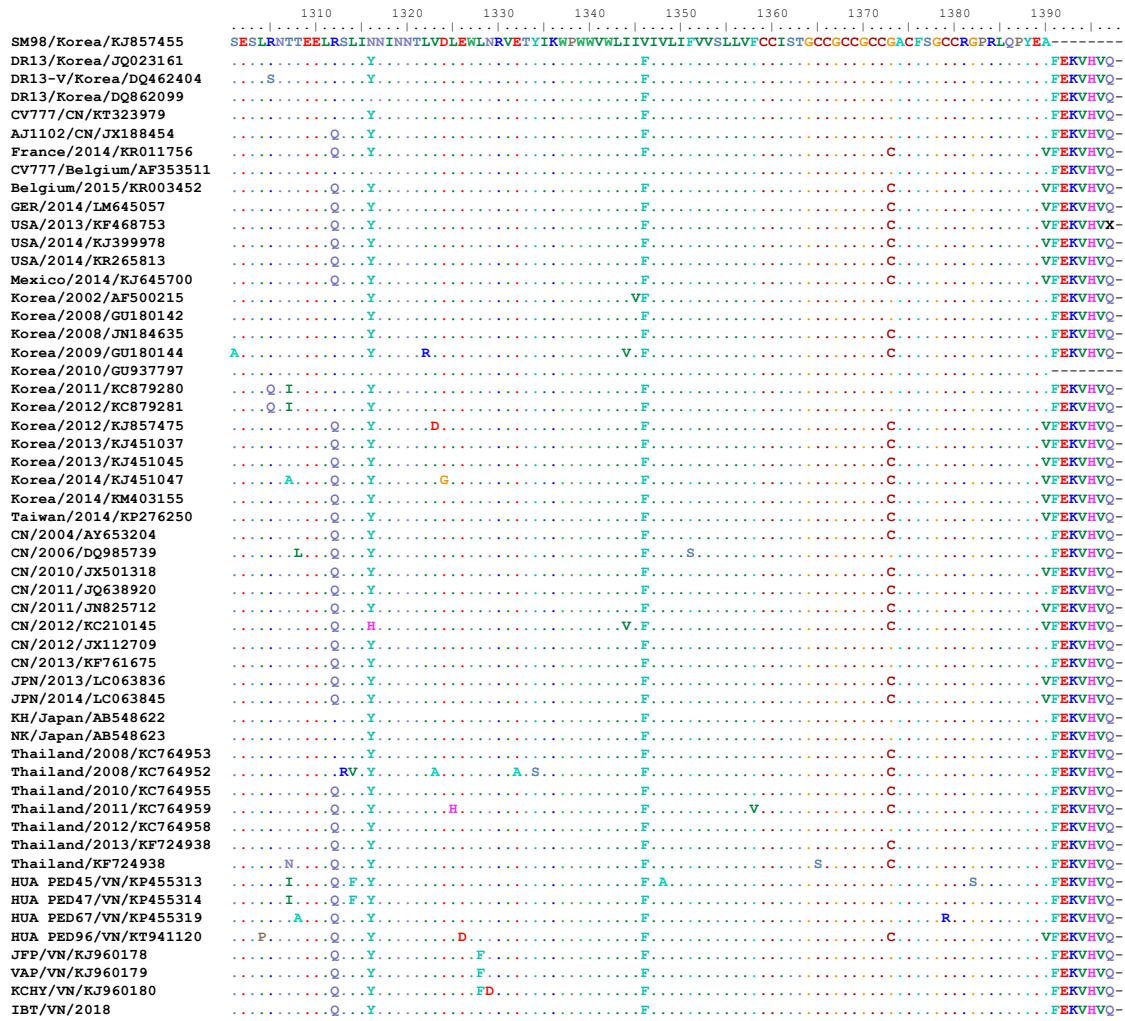

**Figure S1.** Comparison of amino acid sequences of S gene. The blue arrow pointed the insertions (at aa positions <sup>59</sup>NQGV<sup>62</sup> and <sup>145</sup>N), deletion (at aa position <sup>168</sup>DI<sup>169</sup>), and the substitutions at aa <sup>135</sup>DN<sup>136</sup> > <sup>135</sup>SI<sup>136</sup>, <sup>497</sup>R > <sup>T</sup><sup>497</sup>, <sup>506</sup>I > <sup>T</sup><sup>506</sup>, <sup>857</sup>V > <sup>A</sup><sup>857</sup>, <sup>1221</sup>F > <sup>Y</sup><sup>1221</sup>, and <sup>1279</sup>P > <sup>S</sup><sup>1279</sup> in S protein of IBT/VN/2018 strain when comparison with the vaccine strains CV777/CN, SM98/Korea and DR13/Korea. The red arrow pointed the substitutions at aa <sup>144</sup>N > <sup>D</sup><sup>144</sup>, <sup>294</sup>I > <sup>M</sup><sup>294</sup>, <sup>318</sup>A > <sup>S</sup><sup>318</sup>, <sup>335</sup>V > <sup>I</sup><sup>335</sup>, <sup>361</sup>A > <sup>T</sup><sup>361</sup>, <sup>501</sup>SH<sup>502</sup> > <sup>501</sup>IY<sup>502</sup>, <sup>682</sup>L > <sup>F</sup><sup>682</sup>, <sup>777</sup>P > <sup>L</sup><sup>777</sup>, <sup>1009</sup>L > <sup>M</sup><sup>1009</sup>, <sup>1089</sup>S > <sup>L</sup><sup>1089</sup>, <sup>1207</sup>T > <sup>D</sup><sup>1207</sup>, <sup>1229</sup>S > <sup>G</sup><sup>1229</sup>, and <sup>1251</sup>D > <sup>E</sup><sup>1251</sup> in S protein of IBT/VN/2018 strain when comparison with the vaccine strains AJ1102/CN, CV777/CN, SM98/Korea and DR13/Korea.
