# Supplementary material for: Changes in the spike and nucleocapsid protein of porcine epidemic diarrhea virus strain in Vietnam—a molecular potential for the vaccine development?
Source: PeerJ journal article supplement (doi:10.7717/peerj.12329), 2021-10-18
Supplement: Figure_S2.pdf [file Figure_S2.pdf]

```

                                410      420      430      440
CV777/Belgium/AF3353511  AIYDDVCGAPSDVTHANLEWDTAVDGGDTAVEIINEIFDTGN*
CV777/CN/KT323979      .....V.....*
AJ1102/CN/JX188454     .....V.....*
SM98/Korea/GU937797   .....V.....*
DR13/Korea/JQ023162   .....V.....*
DR13/Korea/JQ023161   .....V.....V.....*
GER/2014/LM645057     .....L...S.....*
GER/2015/LT898435     .....L...S.....*
GER/LT906582          .....L...S.....*
France/2014/KR011756   .....L...S.....*
Belgium/2015/KR003452  .....L...S.....*
USA/2013/KF468752     .....V.....*
IA1/USA/2013/KF468753  .....V.....*
IA2/USA/2013/KF468754  .....V.....*
USA/2013/KJ645704     .....V.....*
USA/2013/KJ645635     .....V.....*
USA/2013/KU893861     .....V.....*
USA/2014/KJ645702     .....V.....*
JPN/2013/LC063814     .....V.....*
JPN/2014/LC063813     .....V.....*
Korea/2001/MF737355    .....V.....V.....S*
Korea/2013/KJ662670    .....V.....*
Korea/2014/KR873431    .....V.....*
Korea/2014/KM403155    .....V.....*
Korea/2016/KY963963    .....V.....*
JS2008/CN/KC109141    .....V.....*
GD1/CN/2011/JX647847   .....V.....*
GDA/CN/2012/JX112709   .....V.....*
SDM/CN/2012/JX560761   .....V.....*
CN/2014/KU252649      .....L...S.....*
CN/2016/MF462814      .....V.....*
CH hubei/CN/2016/KY928065 .....V.S.....*
CN/2017/MF375374      .....L.S...S.....*
CBR1/Thailand/2014/KR610993 .....V.....*
KCHY/VN/2013/KJ960180  .....V.....*
VAP/VN/2013/KJ960178  .....V.....*
JFP/VN/2013/KJ960179  .....V.....*
IBT/VN/2018           .....V.....*

```

**Figure S2.** Comparison of amino acid sequences of N gene. The red arrow pointed the changes at aa positions  $^{216}\text{V} > \text{M}^{216}$ ,  $^{400}\text{E} > \text{D}^{400}$  in PEDV-VN strains (IBT/VN/2018, KCHY, VAP, and JFP) and some of PEDV strains (from China and Thailand) compared to CV777/AF3353511 strain. The green arrow pointed the changes at aa positions  $^{364}\text{V} > \text{I}^{364}$  and  $^{378}\text{N} > \text{S}^{378}$  between IBT/VN/2018 strain and other strains.
