# Supplementary material for: Changes in the spike and nucleocapsid protein of porcine epidemic diarrhea virus strain in Vietnam—a molecular potential for the vaccine development?
Source: PeerJ journal article supplement (doi:10.7717/peerj.12329), 2021-10-18
Supplement: Figure_S3.pdf [file Figure_S3.pdf]

|                               | 210                           | 220                                 |
|-------------------------------|-------------------------------|-------------------------------------|
| CV777/Belgium/AF353511        | ..... ..... ..... ..... ..... | HQIVG ITNA AFDS IQ LDEYATISE*       |
| CV777/CN/KT323979             | ..... ..... ..... ..... ..... | ..... ..... ..... ..... .....       |
| AJ1102/CN/JX188454            | ..... ..... ..... ..... ..... | ..... ..... ..... ..... .....       |
| DR13/Korea/JQ023161           | ..... ..... ..... ..... ..... | ..... ..... ..... ..... .....       |
| DR13/Korea/JQ023162           | ..... ..... ..... ..... ..... | ..... ..... ..... ..... .....       |
| SDM/CN/2012/JX560761          | ..... ..... ..... ..... ..... | ..... ..... ..... ..... .....       |
| JS2008/CN/KC109141            | ..... ..... ..... ..... ..... | ..... ..... ..... ..... .....       |
| GER/2014/LM645057             | ..... ..... ..... ..... ..... | ..... ..... ..... ..... .....       |
| GER/2015/LT898435             | ..... ..... ..... ..... ..... | ..... ..... ..... ..... .....       |
| GER/LT906582                  | ..... ..... ..... ..... ..... | ..... ..... ..... ..... .....       |
| France/2014/KR011756          | ..... ..... ..... ..... ..... | ..... ..... ..... ..... .....       |
| Belgium/2015/KR003452         | ..... ..... ..... ..... ..... | ..... ..... ..... ..... .....       |
| Indiana1283/USA/2013/KJ645635 | ..... ..... ..... ..... ..... | ..... ..... ..... ..... .....       |
| Ohio126/USA/2014/KJ645702     | ..... ..... ..... ..... ..... | ..... ..... ..... ..... .....       |
| Minnesota52/USA/2013/KJ645704 | ..... ..... ..... ..... ..... | ..... ..... ..... ..... .....       |
| KNU1406-1/Korea/2014/KM403155 | ..... ..... ..... ..... ..... | ..... ..... ..... ..... .....       |
| KCHY-310113/VN/2013/KJ960180  | ..... ..... ..... ..... ..... | ..... ..... ..... ..... .....       |
| VAP1113-1/VN/2013/KJ960178    | ..... ..... ..... ..... ..... | .....V..... ..... ..... ..... ..... |
| JFP1013-1/VN/2013/KJ960179    | ..... ..... ..... ..... ..... | .....V..... ..... ..... ..... ..... |
| GD1/CN/2011/JX647847          | ..... ..... ..... ..... ..... | ..... ..... ..... ..... .....       |
| GDA/CN/2012/JX112709          | ..... ..... ..... ..... ..... | .....H..... ..... ..... ..... ..... |
| MN/USA/2013/KF468752          | ..... ..... ..... ..... ..... | ..... ..... ..... ..... .....       |
| IA1/USA/2013/KF468753         | ..... ..... ..... ..... ..... | ..... ..... ..... ..... .....       |
| IA2/USA/2013/KF468754         | ..... ..... ..... ..... ..... | ..... ..... ..... ..... .....       |
| JPN/2014/LC063813             | ..... ..... ..... ..... ..... | ..... ..... ..... ..... .....       |
| JPN/2013/LC063814             | ..... ..... ..... ..... ..... | ..... ..... ..... ..... .....       |
| Korea/2001/MF737355           | ..... ..... ..... ..... ..... | ..... ..... ..... ..... .....       |
| Korea/2013/KJ662670           | ..... ..... ..... ..... ..... | ..... ..... ..... ..... .....       |
| Korea/2014/KR873431           | ..... ..... ..... ..... ..... | ..... ..... ..... ..... .....       |
| Korea/2016/KY963963           | ..... ..... ..... ..... ..... | ..... ..... ..... ..... .....       |
| USA/2013/KU893861             | ..... ..... ..... ..... ..... | ..... ..... ..... ..... .....       |
| CN/2014/KU252649              | ..... ..... ..... ..... ..... | ..... ..... ..... ..... .....       |
| CN/2016/MF462814              | ..... ..... ..... ..... ..... | ..... ..... ..... ..... .....       |
| CH hubei/CN/2016/KY928065     | ..... ..... ..... ..... ..... | ..... ..... ..... ..... .....       |
| CN/2017/MF375374              | ..... ..... ..... ..... ..... | ..... ..... ..... ..... .....       |
| CBR1/Thailand/2014/KR610993   | ..... ..... ..... ..... ..... | .....V..... ..... ..... ..... ..... |
| IBT/VN/2018                   | ..... ..... ..... ..... ..... | ..... ..... ..... ..... .....       |

**Figure S3.** Comparison of amino acid sequences of ORF3 gene. There were four substitutions at aa positions <sup>25</sup>L > S<sup>25</sup>, <sup>70</sup>I > V<sup>70</sup>, <sup>107</sup>C > F<sup>107</sup>, and <sup>168</sup>D > N<sup>168</sup> that found in PEDV-VN (IBT/VN/2018, KCHY, VAP, and JFP) strains and GD1/CN/2011/JX647847, GDA/CN/2012/JX112709, CH Hubei/CN/2016/KY928065, and CBR1/Thailand/2014/KR610993 strains compared to other strains.
