# Supplementary material for: Changes in the spike and nucleocapsid protein of porcine epidemic diarrhea virus strain in Vietnam—a molecular potential for the vaccine development?
Source: PeerJ journal article supplement (doi:10.7717/peerj.12329), 2021-10-18
Supplement: Figure_S4.pdf [file Figure_S4.pdf]

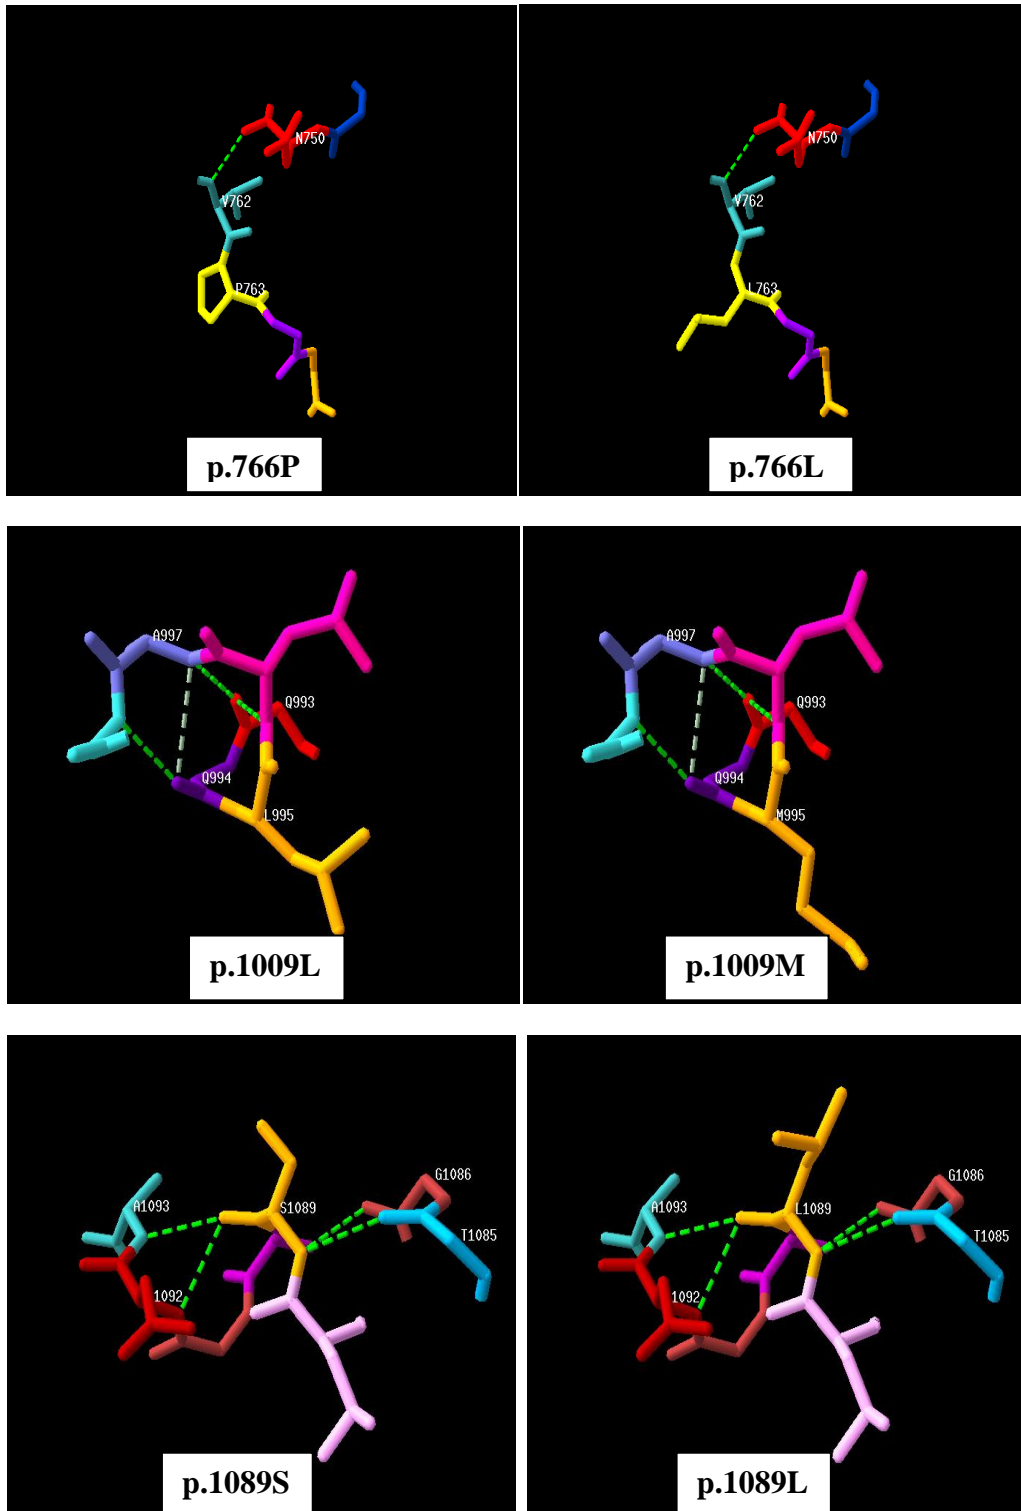

**Figure S4.** Homology modeling predicts the 3D structure of S protein of IBT/VN/2018 through sequence alignment of the known 3D structure strain (6U7K). No changes were observed in the 3D structure of the S protein of IBT/VN/2018 at mutated sites p.P766L, p.L1009M, and p.S1089L as compared to 6U7K strain.
