# Supplementary material for: Changes in the spike and nucleocapsid protein of porcine epidemic diarrhea virus strain in Vietnam—a molecular potential for the vaccine development?
Source: PeerJ journal article supplement (doi:10.7717/peerj.12329), 2021-10-18
Supplement: Table_S1.pdf [file Table_S1.pdf]

**Table S1:** Genetic similarity of complete nucleotide sequences (%) between the IBT/VN/2018 and other reference sequences.

| <b>Strain</b>                 | <b>%</b> | <b>Strain</b>                 | <b>%</b> |
|-------------------------------|----------|-------------------------------|----------|
| CV777/Belgium/AF353511        | 96.3     | SDM/CN/2012/JX560761          | 96.6     |
| CV777/China/KT323979          | 96.5     | KCHY-310113/VN/2013/KJ960180  | 97.8     |
| DR13/Korea/JQ023162           | 96.5     | VAP1113-1/VN/2013/KJ960178    | 97.8     |
| DR13/Korea/JQ023161           | 97.1     | JFP1013-1/VN/2013/KJ960179    | 97.8     |
| SM98/Korea/GU937797           | 95.9     | JS2008/CN/KC109141            | 96.6     |
| AJ1102/China/JX188454         | 98.1     | GD1/CN/2011/JX647847          | 98.1     |
| GER/2014/LM645057             | 97.5     | GDA/CN/2012/JX112709          | 98.1     |
| GER/2015/LT898435             | 97.4     | MN/USA/2013/KF468752          | 97.9     |
| GER/LT906582                  | 96.2     | IA1/USA/2013/KF468753         | 97.9     |
| France/2014/KR011756          | 97.4     | IA2/USA/2013/KF468754         | 97.9     |
| Belgium/2015/KR003452         | 97.4     | JPN/2014/LC063813             | 97.4     |
| Indiana1283/USA/2013/KJ645635 | 97.4     | JPN/2013/LC063814             | 97.5     |
| Ohio126/USA/2014/KJ645702     | 97.4     | Korea/2001/MF737355           | 97.5     |
| Minnesota52/USA/2013/KJ645704 | 97.4     | Korea/2013/KJ662670           | 97.9     |
| USA/2013/KU893861             | 97.9     | Korea/2014/KR873431           | 97.9     |
| CN/2014/KU252649              | 97.9     | Korea/2016/KY963963           | 97.6     |
| CN/2016/MF462814              | 97.7     | KNU1406-1/Korea/2014/KM403155 | 97.5     |
| CN/2017/MF375374              | 97.7     | CBR1/Thailand/2014/KR610993   | 95.7     |
| CH hubei/CN/2016/KY928065     | 99.3     |                               |          |
