# Supplementary material for: Changes in the spike and nucleocapsid protein of porcine epidemic diarrhea virus strain in Vietnam—a molecular potential for the vaccine development?
Source: PeerJ journal article supplement (doi:10.7717/peerj.12329), 2021-10-18
Supplement: Table_S2.pdf [file Table_S2.pdf]

**Table S2:** Genetic similarity of nucleotide sequences and amino acid sequences for the coding region of the Spike protein (%) between the IBT/VN/2018 and other reference sequences.

| <b>Strain</b>          | <b>Nucleotide sequence (%)</b> | <b>Amino acid sequence (%)</b> |
|------------------------|--------------------------------|--------------------------------|
| France/2014/KR011756   | 94.9                           | 94.4                           |
| CV777/Belgium/AF353511 | 93.2                           | 92.5                           |
| Belgium/2015/KR003452  | 94.7                           | 94.1                           |
| GER/2014/LM645057      | 94.9                           | 94.5                           |
| DR13/Korea/JQ023161    | 94.2                           | 93.6                           |
| USA/2013/KF468753      | 97.5                           | 97.8                           |
| USA/2014/KJ399978      | 94.8                           | 94.3                           |
| USA/2014/KR265813      | 97.5                           | 97.7                           |
| Mexico/2014/KJ645700   | 97.4                           | 97.6                           |
| Korea/2002/AF500215    | 93.9                           | 93.0                           |
| Korea/2008/GU180142    | 94.2                           | 93.7                           |
| Korea/2008/JN184635    | 96.1                           | 95.2                           |
| Korea/2009/GU180144    | 94.5                           | 94.1                           |
| Korea/2010/GU937797    | 92.2                           | 91.1                           |
| Korea/2011/KC879280    | 95.9                           | 96.2                           |
| Korea/2012/KC879281    | 95.9                           | 96.1                           |
| Korea/2012/KJ857475    | 97.3                           | 97.1                           |
| Korea/2013/KJ451037    | 95.8                           | 94.8                           |
| Korea/2013/KJ451045    | 96.8                           | 97.1                           |
| Korea/2014/KJ451047    | 97.1                           | 97.0                           |
| Korea/2014/KM403155    | 94.7                           | 94.2                           |
| Taiwan/2014/KP276250   | 97.4                           | 97.4                           |
| CN/2004/AY653204       | 94.7                           | 94.0                           |
| CN/2006/DQ985739       | 93.7                           | 93.5                           |
| CN/2010/JX501318       | 94.9                           | 94.2                           |
| CN/2011/JQ638920       | 97.7                           | 97.6                           |
| CN/2011/JN825712       | 97.5                           | 97.6                           |
| CN/2012/KC210145       | 97.4                           | 97.4                           |
| CN/2012/JX112709       | 98.1                           | 98.4                           |

| <b>Strain</b>          | <b>Nucleotide sequence (%)</b> | <b>Amino acid sequence (%)</b> |
|------------------------|--------------------------------|--------------------------------|
| CN/2013/KF761675       | 98.0                           | 97.9                           |
| JPN/2013/LC063836      | 97.5                           | 97.6                           |
| JPN/2014/LC063845      | 94.8                           | 94.3                           |
| KH/Japan/AB548622      | 94.0                           | 93.5                           |
| NK/Japan/AB548623      | 94.1                           | 93.4                           |
| Thailand/2008/KC764953 | 96.3                           | 95.4                           |
| Thailand/2008/KC764952 | 95.3                           | 93.5                           |
| Thailand/2010/KC764955 | 95.4                           | 96.1                           |
| Thailand/2011/KC764959 | 95.0                           | 95.3                           |
| Thailand/2012/KC764958 | 94.9                           | 95.1                           |
| Thailand/2013/KF724938 | 96.3                           | 96.3                           |
| Thailand/KF724938      | 96.0                           | 96.1                           |
| HUA PED45/VN/KP455313  | 97.4                           | 97.5                           |
| HUA PED47/VN/KP455314  | 97.7                           | 98.0                           |
| HUA PED67/VN/KP455319  | 94.7                           | 94.7                           |
| HUA PED96/VN/KT941120  | 96.9                           | 96.0                           |
| JFP/VNN/KJ960178       | 97.4                           | 97.4                           |
| VAP/VN/KJ960179        | 97.6                           | 97.8                           |
| KCHY/VN/KJ960180       | 97.5                           | 97.7                           |
| SM98/Korea/KJ857455    | 92.4                           | 91.2                           |
| DR13/Korea/DQ862099    | 93.2                           | 92.5                           |
| CV777/CN/KT323979      | 93.3                           | 92.1                           |
| AJ1102/CN/JX188454     | 97.8                           | 98.3                           |
