# Supplementary material for: Changes in the spike and nucleocapsid protein of porcine epidemic diarrhea virus strain in Vietnam—a molecular potential for the vaccine development?
Source: PeerJ journal article supplement (doi:10.7717/peerj.12329), 2021-10-18
Supplement: Table_S3.pdf [file Table_S3.pdf]

**Table S3:** Genetic similarity of nucleotide sequences and amino acid sequences for the coding region of the Nucleocapsid protein (%) between the IBT/VN/2018 and other reference sequences.

| <b>Strain</b>               | <b>Nucleotide sequence (%)</b> | <b>Amino acid sequence (%)</b> |
|-----------------------------|--------------------------------|--------------------------------|
| CV777/Belgium/AF3353511     | 95.7                           | 96.8                           |
| DR13/Korea/JQ023161         | 96.3                           | 96.5                           |
| DR13/Korea/JQ023162         | 96.7                           | 96.5                           |
| SM98/Korea/GU937797         | 95.6                           | 96.5                           |
| GER/2014/LM645057           | 96.9                           | 98.1                           |
| GER/2015/LT898435           | 96.6                           | 97.5                           |
| GER/LT906582                | 95.7                           | 96.8                           |
| France/2014/KR011756        | 96.8                           | 97.9                           |
| Belgium/2015/KR003452       | 96.9                           | 97.9                           |
| USA/2013/KF468752           | 97.2                           | 98.4                           |
| IA1/USA/2013/KF468753       | 97.2                           | 98.4                           |
| IA2/USA/2013/KF468754       | 97.1                           | 98.1                           |
| USA/2013/KJ645704           | 97.2                           | 98.4                           |
| USA/2013/KJ645635           | 97.2                           | 98.4                           |
| USA/2013/KU893861           | 97.2                           | 98.4                           |
| USA/2014/KJ645702           | 97.0                           | 98.1                           |
| JPN/2013/LC063814           | 97.2                           | 98.4                           |
| JPN/2014/LC063813           | 97.1                           | 98.1                           |
| Korea/2001/MF737355         | 96.3                           | 97.2                           |
| Korea/2013/KJ662670         | 97.2                           | 98.4                           |
| Korea/2014/KR873431         | 97.2                           | 98.4                           |
| Korea/2014/KM403155         | 97.1                           | 98.1                           |
| Korea/2016/KY963963         | 96.6                           | 97.5                           |
| JS2008/CN/KC109141          | 96.7                           | 97.9                           |
| GD1/CN/2011/JX647847        | 97.5                           | 98.1                           |
| GDA/CN/2012/JX112709        | 97.3                           | 97.9                           |
| SDM/CN/2012/JX560761        | 96.6                           | 97.7                           |
| CN/2014/KU252649            | 96.8                           | 97.9                           |
| CN/2016/MF462814            | 96.9                           | 98.1                           |
| CN/2017/MF375374            | 96.6                           | 97.9                           |
| CH hubei/CN/2016/KY928065   | 99.0                           | 98.8                           |
| CBR1/Thailand/2014/KR610993 | 97.3                           | 97.9                           |
| KCHY/VN/2013/KJ960180       | 97.4                           | 98.1                           |
| VAP/VN/2013/KJ960178        | 97.3                           | 97.9                           |
| JFP/VN/2013/KJ960179        | 97.3                           | 97.9                           |
| CV777/CN/KT323979           | 92.5                           | 93.4                           |
| AJ1102/CN/JX188454          | 97.5                           | 97.9                           |
